# Supplementary material for: The Ca2+-Activated K+ Channel KCa3.1 as a Potential New Target for the Prevention of Allograft Vasculopathy
Source: PubMed Central journal article supplement (PMC3843675; doi:10.1371/journal.pone.0081006), 2013-11-29
Supplement: pone.0081006.s001.pdf [file pone.0081006.s001.pdf]

| <b>Treatment group</b>                              | <b>Luminal occlusion</b>                 | <b>Intima/media ratio</b>                |
|-----------------------------------------------------|------------------------------------------|------------------------------------------|
| Vehicle (n = 8)                                     | 52.8 ± 5.8%                              | 1.02 ± 0.13                              |
| low-dose TRAM-34 (n = 7)                            | 21.5 ± 6.2% (p = 1.65x10 <sup>-5</sup> ) | 0.41 ± 0.11 (p = 4.87x10 <sup>-4</sup> ) |
| high-dose TRAM-34 (n=6)                             | 22.4 ± 3.4% (p = 4.72x10 <sup>-5</sup> ) | 0.49 ± 0.10 (p = 0.003)                  |
| low-dose sirolimus (n = 6)                          | 16.1 ± 3.6% (p = 2.17x10 <sup>-6</sup> ) | 0.31 ± 0.07 (p = 1.25x10 <sup>-4</sup> ) |
| high-dose sirolimus (n = 6)                         | 3.9 ± 1.2% (p = 4.89x10 <sup>-9</sup> )  | 0.05 ± 0.01 (p = 8.64x10 <sup>-7</sup> ) |
| low-dose TRAM-34 plus<br>low-dose sirolimus (n = 5) | 16.7 ± 3.7% (p = 7.66x10 <sup>-6</sup> ) | 0.27 ± 0.09 (p = 1.24x10 <sup>-4</sup> ) |
| PAP-1 (n = 6)                                       | 38.0 ± 5.8% (p = 0.03)                   | 0.95 ± 0.22                              |
| isograft (n = 4)                                    | 0.6 ± 0.2% (p = 2.08x10 <sup>-8</sup> )  | 0.03 ± 0.00 (p = 5.3x10 <sup>-6</sup> )  |

**Supporting Table 1.**

Percentage of luminal occlusion and intima/media ratios evaluated at three different levels of each harvested graft in the different treatment groups.

| Treatment group                                  | Adventitia [ $\mu\text{m}$ ]                  | Adventitia MNCs                            | Media [ $\mu\text{m}$ ]       | Media MNCs                                | Intima [ $\mu\text{m}$ ]                     | Intima MNCs                                |
|--------------------------------------------------|-----------------------------------------------|--------------------------------------------|-------------------------------|-------------------------------------------|----------------------------------------------|--------------------------------------------|
| Vehicle (n = 8)                                  | 41248 $\pm$ 9242                              | 2865 $\pm$ 480                             | 23462 $\pm$ 1992<br>p = NS    | 1439 $\pm$ 375                            | 24090 $\pm$ 4185                             | 1195 $\pm$ 173                             |
| low-dose TRAM-34 (n = 7)                         | 22856 $\pm$ 4686<br>p = 0.01                  | 2336 $\pm$ 511<br>p = NS                   | 22145 $\pm$ 12078<br>p = NS   | 932 $\pm$ 240<br>p = 0.09                 | 8832 $\pm$ 2488<br>p = 3.6x10 <sup>-4</sup>  | 778 $\pm$ 317<br>p = NS                    |
| high-dose TRAM-34 (n=6)                          | 22369 $\pm$ 4474<br>p = 0.01                  | 2063 $\pm$ 665<br>p = NS                   | 22060 $\pm$ 1830<br>p = NS    | 551 $\pm$ 169<br>p = 0.006                | 10473 $\pm$ 2359<br>p = 0.002                | 442 $\pm$ 92<br>p = 0.002                  |
| low-dose sirolimus (n = 6)                       | 22101 $\pm$ 3897<br>p = 0.01                  | 1610 $\pm$ 402<br>p = NS                   | 29347 $\pm$ 3684<br>p = NS    | 613 $\pm$ 150<br>p = 0.01                 | 8718 $\pm$ 2180<br>p = 5.40x10 <sup>-4</sup> | 799 $\pm$ 154<br>p = 0.09                  |
| high-dose sirolimus (n = 6)                      | 4612 $\pm$ 1883<br>p = 2.1x10 <sup>-4</sup>   | 417 $\pm$ 147<br>p = 3.89x10 <sup>-4</sup> | 19423 $\pm$ 659<br>p = NS     | 221 $\pm$ 74<br>p = 2.88x10 <sup>-4</sup> | 1051 $\pm$ 243<br>p = 1.32x10 <sup>-6</sup>  | 233 $\pm$ 89<br>p = 1.16x10 <sup>-4</sup>  |
| low-dose TRAM-34 plus low-dose sirolimus (n = 5) | 12045 $\pm$ 1887<br>p = 4.55x10 <sup>-4</sup> | 1069 $\pm$ 516<br>p = 0.01                 | 18970 $\pm$ 834<br>p = NS     | 396 $\pm$ 149<br>p = 0.003                | 5255 $\pm$ 1930<br>p=8.4x10 <sup>-5</sup>    | 224 $\pm$ 74<br>p = 2.08x10 <sup>-4</sup>  |
| PAP-1 (n = 6)                                    | 24691 $\pm$ 5267<br>p = 0.03                  | 3039 $\pm$ 493<br>p = NS                   | 18697 $\pm$ 2464<br>p = NS    | 670 $\pm$ 203<br>p = 0.017                | 17261 $\pm$ 3712<br>p = 0.10                 | 528 $\pm$ 117<br>p = 0.005                 |
| isograft (n = 4)                                 | 17442 $\pm$ 2877<br>p = 0.006                 | 229 $\pm$ 51<br>p = 6.96x10 <sup>-4</sup>  | 14893 $\pm$ 604<br>p = 0.0058 | 119 $\pm$ 21<br>p = 4.89x10 <sup>-4</sup> | 410 $\pm$ 45<br>p = 7.6x10 <sup>-6</sup>     | 1.75 $\pm$ 0.25<br>p=3.26x10 <sup>-5</sup> |

**Supporting Table 2.**

Averaged adventitia, media and intima areas measured at three levels in each harvested graft are given in  $\mu\text{m}^2$ . Total mononuclear cell numbers were determined in the same sections.

### Rat Orthotopic Allograft Aorta Transplant (120-day Vehicle Treatment)

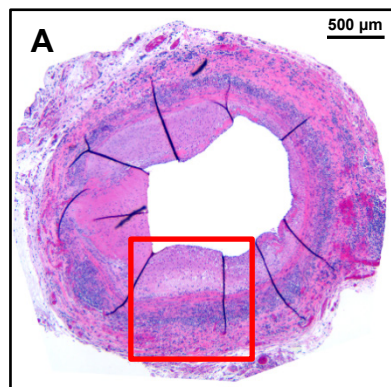

**Allograft H&E**

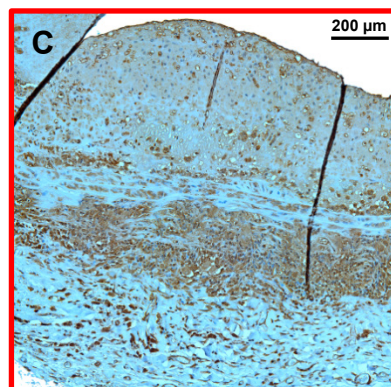

**Allograft  $\alpha$ -SMA**

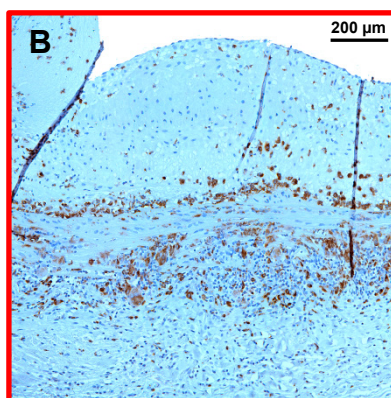

**Allograft ED1**

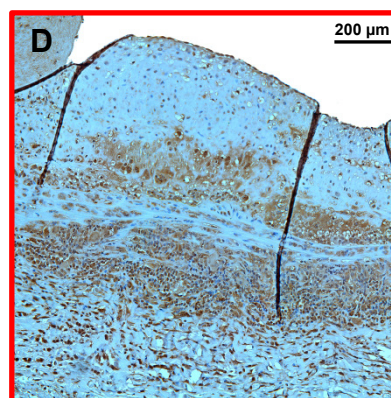

**Allograft KCa3.1**

### Rat Orthotopic Isograft Aorta Transplant (120-day Vehicle Treatment)

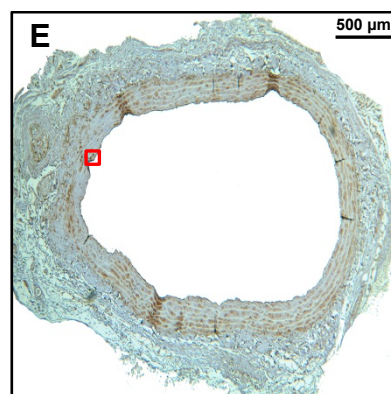

**Isograft KCa3.1**

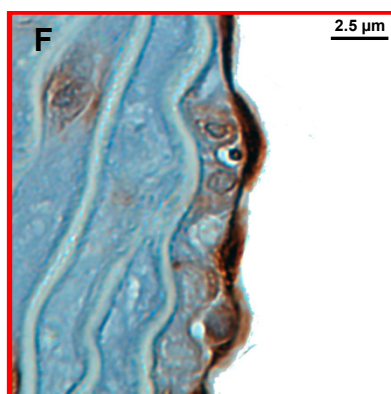

**Isograft KCa3.1**

**Supporting Figure 1. KCa3.1 expression in rat vasculopathy.** A, B, C, D, Serial sections stained with H&E or antibodies against  $\alpha$ -SMA, the macrophage marker ED1 (= CD68) and KCa3.1. Sections A, B, C and D are sequential and each section is 5  $\mu\text{m}$  from the previous section. E, KCa3.1 expression on the vascular endothelium of an isograft. F, Close-up of the boxed area in E.

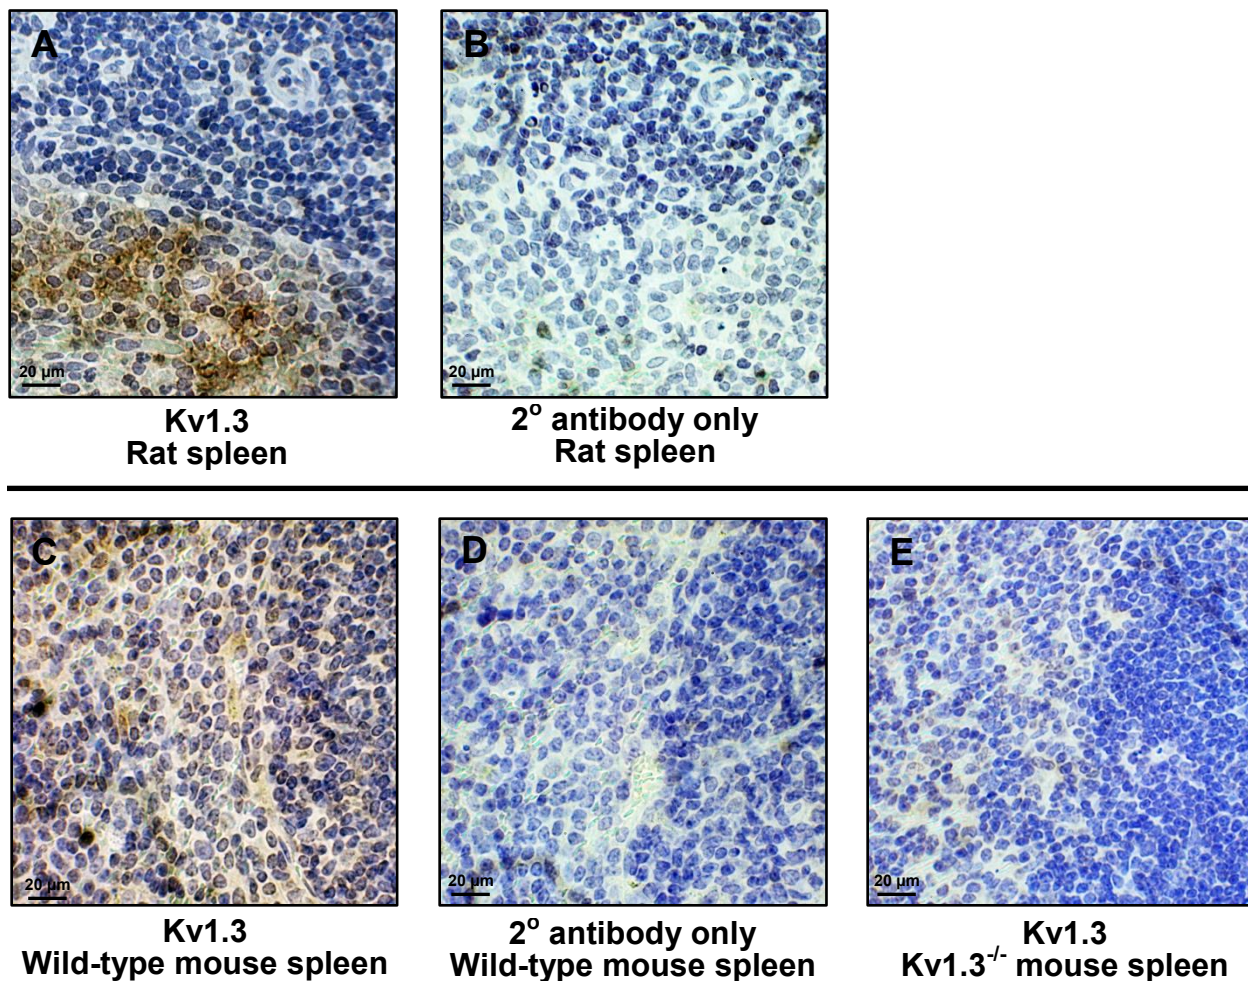

**Supporting Figure 2. Specificity of Kv1.3 antibody (Sigma P9170) in mouse and rat spleen.**

**A, B**, Sequential rat spleen sections stained with the polyclonal anti-Kv1.3 antibody (P9170; 1:750) or secondary antibody only. **C, D, E**, Kv1.3 staining in mouse spleen. **C** and **D** are wild-type mouse spleen sections stained with anti-Kv1.3 (1:750) or secondary antibody only. **E** shows a Kv1.3 knock-out mouse spleen section stained for Kv1.3 (1:750). In all sections secondary antibody binding is visualized by DAB. Sections are counterstained with hematoxylin.
